# Supplementary material for: Lysates of Methylococcus capsulatus Bath induce a lean-like microbiota, intestinal FoxP3+RORγt+IL-17+ Tregs and improve metabolism
Source: PubMed Central journal article supplement (PMC7889900; doi:10.1038/s41467-021-21408-9), 2021-02-17
Supplement: 41467_2021_21408_MOESM1_ESM.pdf [file 41467_2021_21408_MOESM1_ESM.pdf]

# Supplementary Figure 1

A

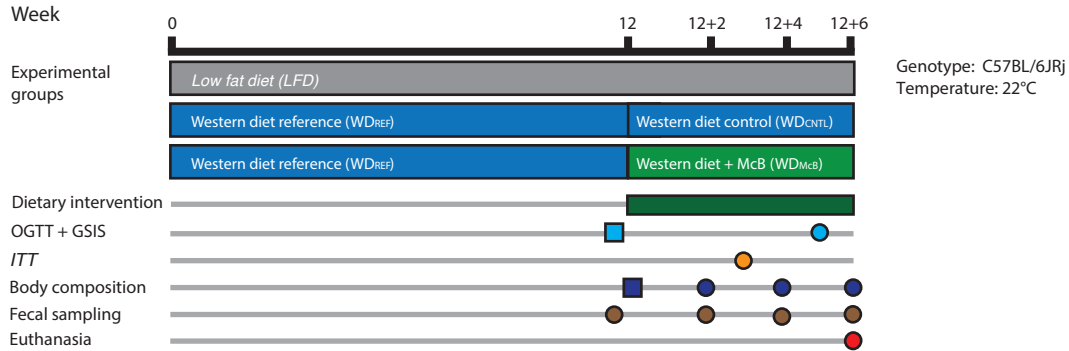

B

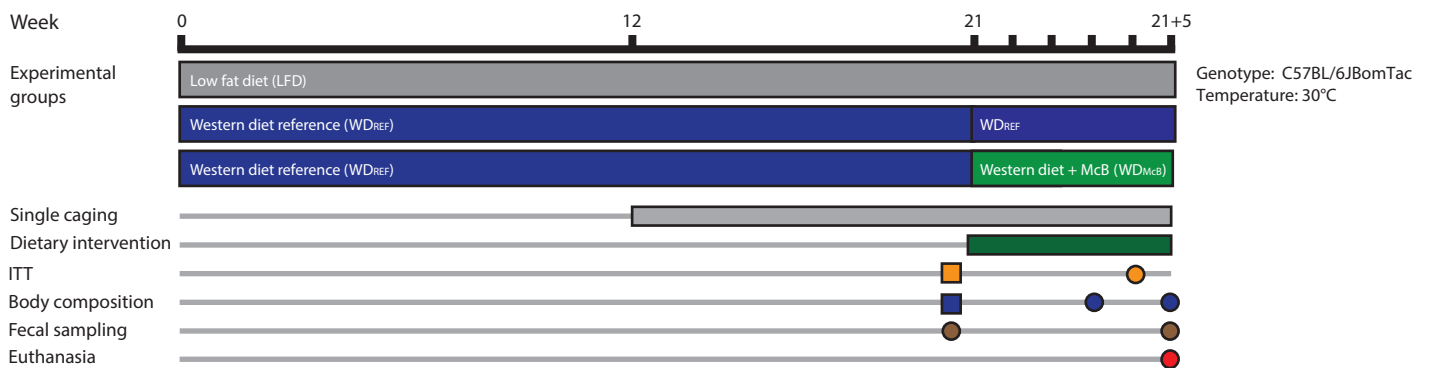

C

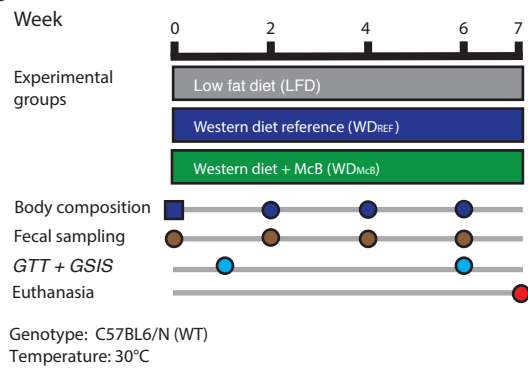

D

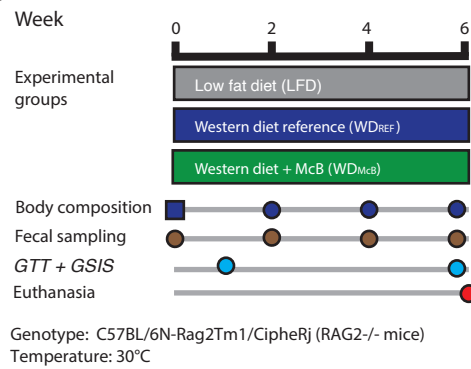

E

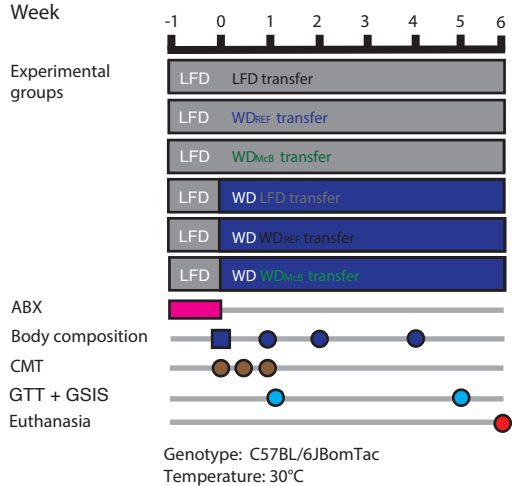

CMT from mice fed respective diets for 21+5 weeks (Panel B)

F

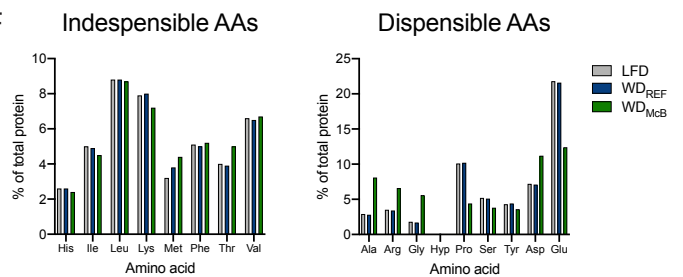

2 **Supplementary Figure 1: Experimental layouts and diet amino acid composition. A)** Study  
3 outline of two independent experiments with initial Western diet ( $WD_{REF}$ ) feeding for 12 weeks at  
4 22°C and oral glucose tolerance test (OGTT), glucose-stimulated insulin secretion (GSIS), and  
5 body composition by MR scan assessed after 11 weeks to stratify groups followed by dietary  
6 intervention for 6 weeks of feeding either WD including McB lysate ( $WD_{McB}$ ) or a matched WD  
7 control diet ( $WD_{CNTL}$ ). During the experimental period body composition, OGTT, GSIS, and fresh  
8 fecal sampling were carried out at the indicated intervals. An insulin tolerance test (ITT) was  
9 carried out in the first of two experiments at the indicated timepoint. The second experiment  
10 included a reference group fed low fat diet (LFD) fed mice. Groups or procedures featured uniquely  
11 in one experiment are italicized. **B)** Study outline with initial Western diet ( $WD_{REF}$ ) feeding for 21  
12 weeks at 30°C. Insulin tolerance test (ITT) and body composition by MR scan were assessed after  
13 20 weeks to stratify groups followed by dietary intervention for 5 weeks of feeding with either  
14  $WD_{REF}$  or WD including McB lysate ( $WD_{McB}$ ). A reference group fed low fat diet (LFD) was  
15 included throughout the experiment (week 0 to week 21+5). Body composition, ITT, and fresh fecal  
16 sampling were carried out at the indicated intervals. Mice were co-housed the first 12 weeks and  
17 then separated to individual cages. **C-D)** Study outline of ‘weight-matched’ WT mice and  $RAG2^{-/-}$   
18 mice fed experimental diets for 7 and 6 weeks, respectively, at 30°C. The two studies were run in  
19 parallel and followed the same scheme with the exception of OGTT + GSIS (*italic letters*), which  
20 was performed in  $RAG2^{-/-}$  only. Body composition, OGTT + GSIS, and fresh fecal sampling were  
21 carried out at the indicated intervals. **E)** Study outline of cecal microbiota transfer (CMT) studies at  
22 30°C. Mice were acclimatized on LFD and remained on this during 7 days of ABX treatment. Then,  
23 50% of the mice were shifted to  $WD_{REF}$ , while the other half remained on LFD for the following 5  
24 weeks of intervention. Body composition, CMT and OGTT + GSIS were carried out at the  
25 indicated time intervals. **F)** Relative distribution of indispensable amino acids (left panel) and  
26 dispensable amino acids (right panel) in the experimental diets.

27

28

# Supplementary Figure 2

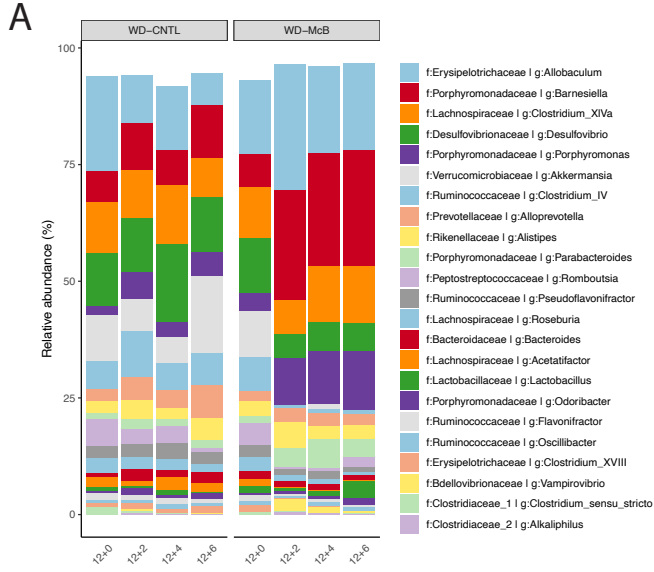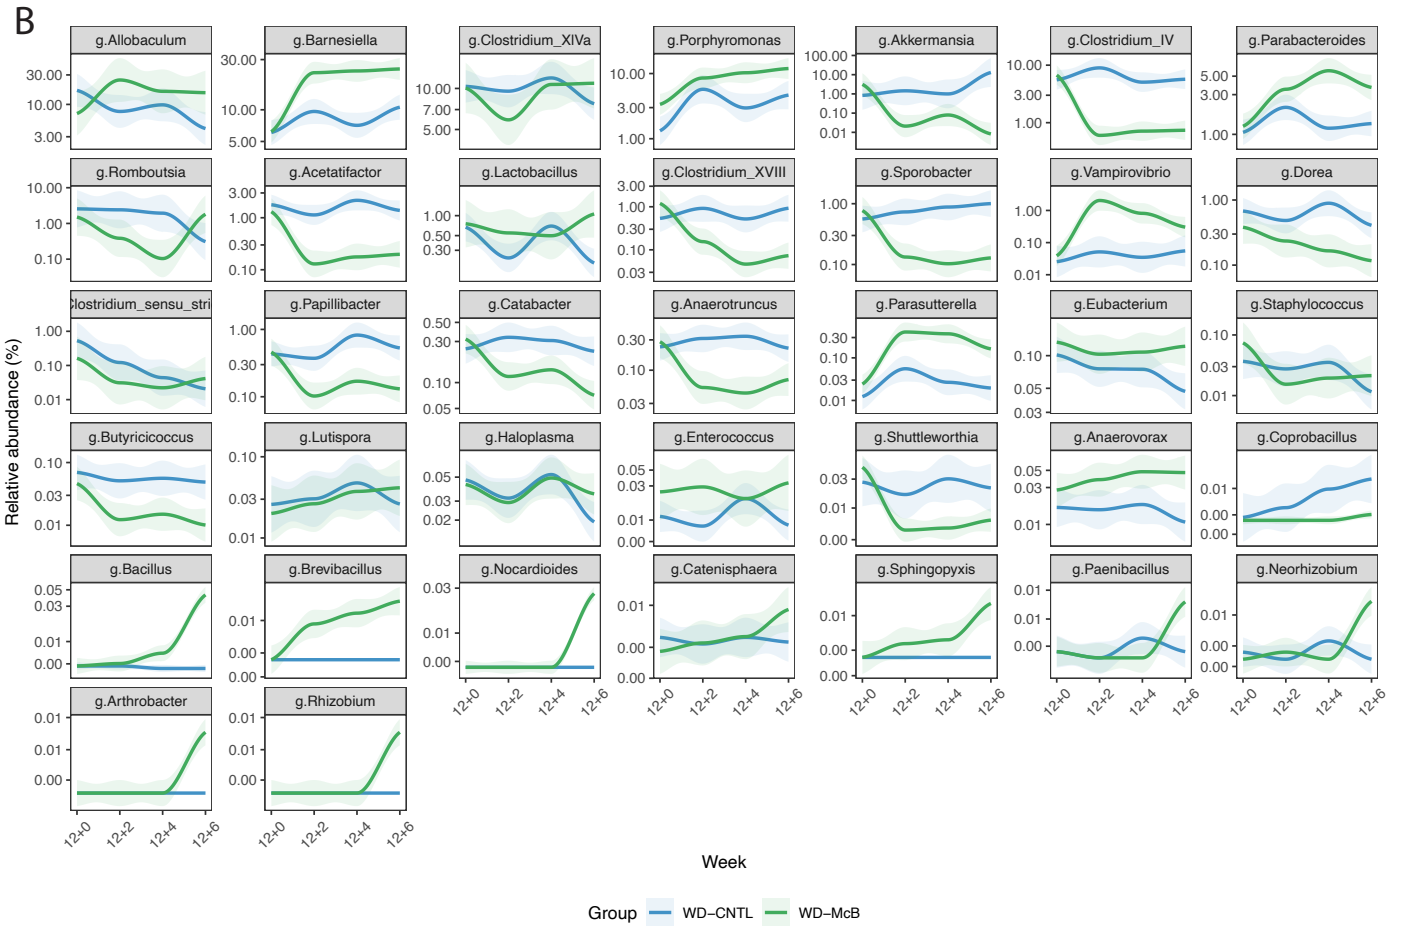

29 **Supplementary Figure 2: Gut microbiota abundance post dietary intervention. A)**  
30 Taxasummary of most abundant bacterial genera showing mean relative abundance in percentage of  
31 the indicated family and genera in each group at indicated time point. **B)** Deseq analysis of fecal  
32 bacterial genera abundances significantly regulated by McB intervention compared to the WD<sub>CNTL</sub>  
33 (p.adj. < 0.05). Relative abundance in % in each group and variation are shown for each regulated  
34 genus at the sampled time points. Fold-change and adjusted p values of individual are indicated in  
35 Supplementary Table 3.  
36  
37

# Supplementary Figure 3

## A Gating strategies for ILC3s

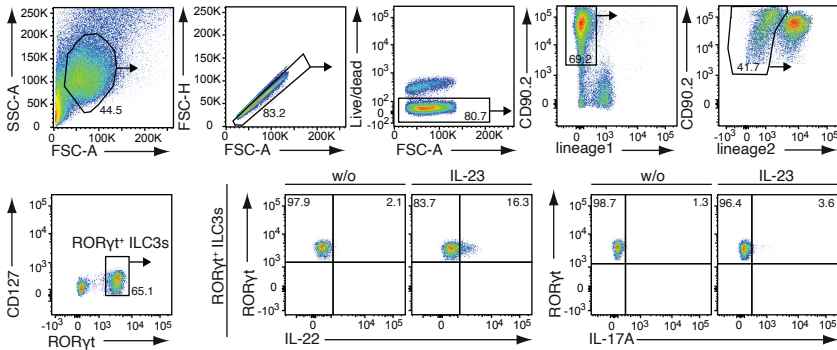

## B Gating strategies for NK cells and T cells

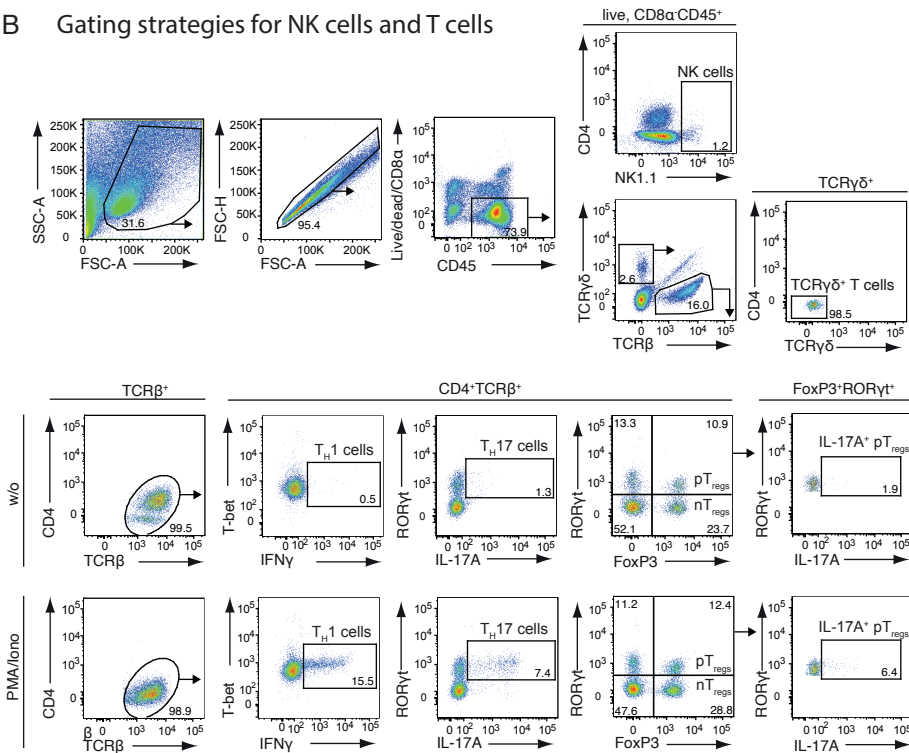

## C Gating strategies for IL-10 and Ki67 in T cells

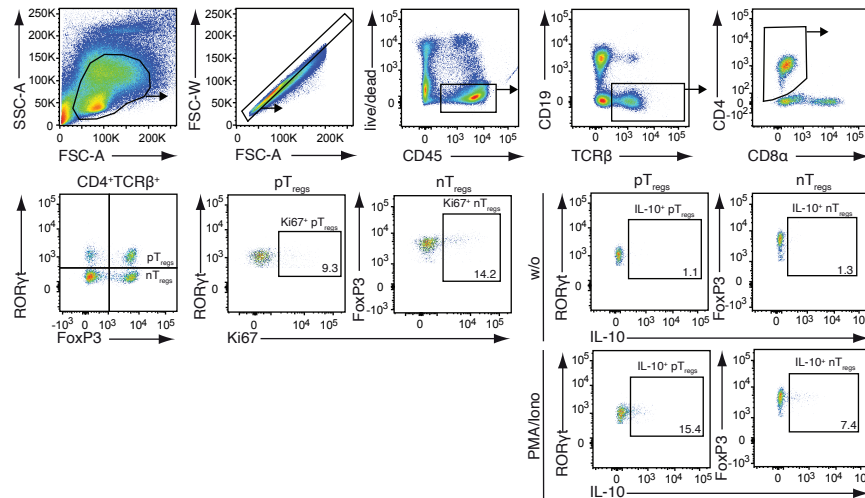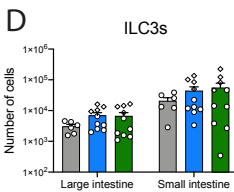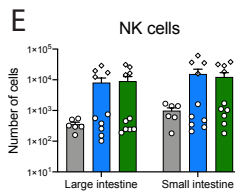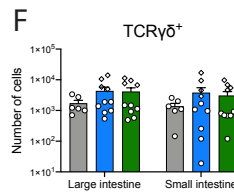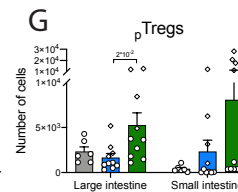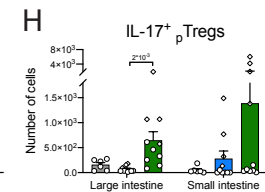

38 **Supplementary Figure 3: Gating strategies and immune cell distribution in small and large**  
39 **intestine. A)** Gating strategy for group 3 innate lymphoid cells (ILC3). Corresponds to  
40 Supplementary Figure 3D. Representative flow cytometry plots of *ex vivo* stimulated small intestine  
41 (SI) lamina propria (LP) cells. ILC3s were gated as single, live cells, lineage1<sup>-</sup>lineage2<sup>-</sup>  
42 CD90.2<sup>+</sup>CD127int<sup>+</sup>RORγt<sup>+</sup> cells. Representative data of RORγt<sup>+</sup> ILC3s after stimulation with or  
43 without (w/o) IL-23 are shown. Lineage1: CD11c, CD19, CD45R/B220, Ly-6G/Ly-6C (Gr-1), Ter119,  
44 NK1.1; Lineage2: CD3ε, CD8α, TCRβ, TCRγδ. **B)** Gating strategy for NK cells and T cells.  
45 Corresponds to Supplementary Figure 3E-H; 4A-B; 5J. Representative flow cytometry plots of *ex*  
46 *vivo* stimulated colon lamina propria cells. NK cells were gated as single, live cells, CD8α<sup>-</sup>  
47 CD45<sup>+</sup>NK1.1<sup>+</sup>; TCRγδ<sup>+</sup> T cells were gated as single, live cells, CD8α<sup>-</sup>CD45<sup>+</sup>TCRγδ<sup>+</sup>CD4<sup>-</sup>; CD4<sup>+</sup> T<sub>H</sub>1  
48 cells were gated as single, live cells, CD8α<sup>-</sup>CD45<sup>+</sup>TCRβ<sup>+</sup>CD4<sup>+</sup>T-bet<sup>+</sup>IFNγ<sup>+</sup>; CD4<sup>+</sup> T<sub>H</sub>17 cells were  
49 gated as single, live cells, CD8α<sup>-</sup>CD45<sup>+</sup>TCRβ<sup>+</sup>CD4<sup>+</sup>RORγt<sup>+</sup>IL-17A<sup>+</sup>. Natural regulatory T cells (nT<sub>regs</sub>)  
50 were gated as single, live cells, CD8α<sup>-</sup>CD45<sup>+</sup>TCRβ<sup>+</sup>CD4<sup>+</sup>FoxP3<sup>+</sup>RORγt<sup>-</sup> and peripheral-induced  
51 regulatory T cells (pT<sub>regs</sub>) were gated as single, live cells, CD8α<sup>-</sup>CD45<sup>+</sup>TCRβ<sup>+</sup>CD4<sup>+</sup>FoxP3<sup>+</sup>RORγt<sup>+</sup>.  
52 Representative data of TCRβ<sup>+</sup>CD4<sup>+</sup> T cells after stimulation with or without (w/o) PMA and Ionomycin  
53 (PMA/Iono) are shown. **C)** Gating strategy for IL-10<sup>+</sup> and Ki67<sup>+</sup> n- and pTregs. Corresponds to  
54 Figure 2O-R and Supplementary Figure 4C-F. Representative flow cytometry plots of *ex vivo*  
55 stimulated colon lamina propria cells. Natural and peripheral-induced regulatory T cells (nT<sub>regs</sub> and pT<sub>regs</sub>,  
56 respectively) were gated as in (B), stained for Ki67 and IL-10; the latter with or without (w/o) PMA and  
57 Ionomycin (PMA/Iono). **D)** ILC3 cell number in large intestine (LI)-LP and SI-LP. **E)** NK1.1<sup>+</sup> NK  
58 cell number in LI-LP and SI-LP. **F)** TCRγδ<sup>+</sup> T cell number in LI-LP and SI-LP. **G)** Amount of  
59 pT<sub>regs</sub> in LI-LP and SI-LP. **H)** Amount of IL17<sup>+</sup> pT<sub>regs</sub> in LI-LP and SI-LP. **D-H)** Bars represent mean  
60 ± SEM and dots individual data points. All p-values < 1\*10<sup>-1</sup> between WD<sub>CNTL</sub> and indicated group  
61 are depicted. Dot shapes indicate individuals data points in Exp1 (squares) and Exp2 (circles). Grey  
62 bars: LFD-fed, n = 6; Blue bars: WD<sub>CNTL</sub>-fed, n= 10; and Green bars: WD<sub>MeB</sub>-fed, n= 10. Statistical  
63 significant differences to WD<sub>CNTL</sub> by one-way ANOVA, adjusted for multiple comparisons by  
64 Dunnett's post hoc.

65

66

# Supplementary Figure 4

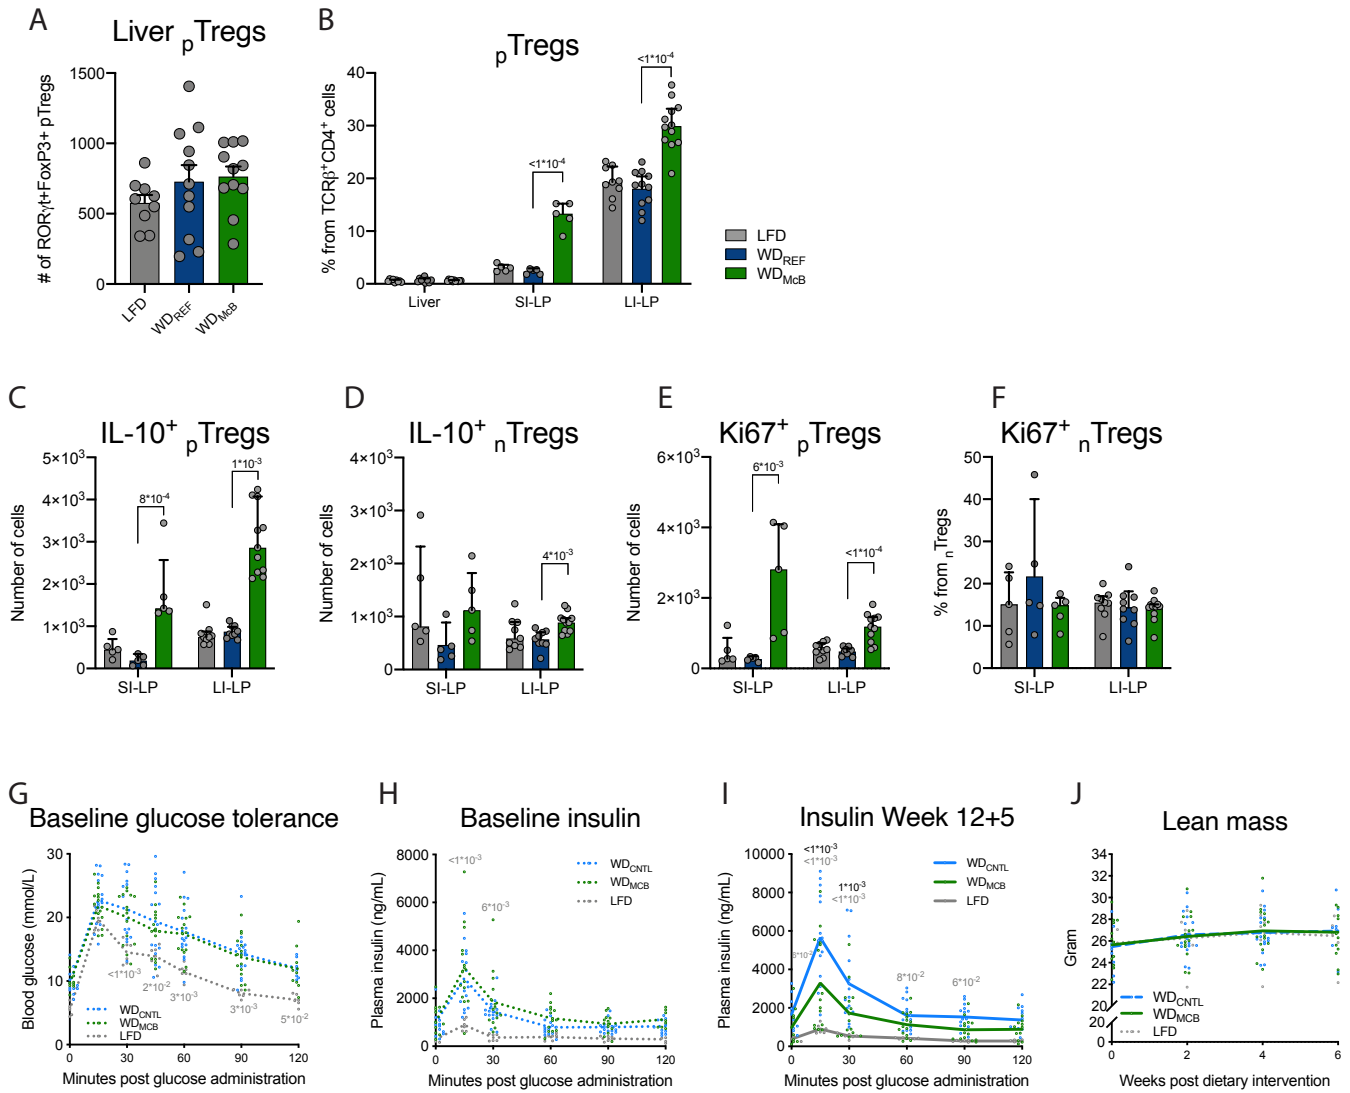

67 **Supplementary Figure 4: Immunometabolic response to experimental diet feeding. A-B)**  
68 Number of hepatic (A) pT<sub>regs</sub> and their relative distribution between liver, SI-LP and LI-LP (B).  
69 Statistical significant differences to WD<sub>REF</sub> by one-way ANOVA, adjusted for multiple comparisons  
70 by Dunnett's post hoc. In A, n = 9 (LFD) or 11 (WD<sub>REF</sub> and WD<sub>M<sub>c</sub>B</sub>). In B, SI-LP n = 5 per group.  
71 Liver n = 9 (LFD and WD<sub>REF</sub>) or 11 (WD<sub>M<sub>c</sub>B</sub>). LI-LP n = 9 (LFD), and 11 (WD<sub>REF</sub>) or 12 (WD<sub>M<sub>c</sub>B</sub>).  
72 **C-F)** Amount of indicated cells in SI- and LI-LP from 'weight-matched' mice housed at  
73 thermoneutrality. Statistical significant differences to WD<sub>REF</sub> by one-way ANOVA, adjusted for  
74 multiple comparisons by Dunnett's post hoc, except for LI-LP in C and F where statistical  
75 differences were evaluated by Kruskal-Wallis test, adjusted with Dunn's post hoc. SI-LP n = 5 per  
76 group. LI-LP n = 9 (LFD and WD<sub>REF</sub>) or 11 (WD<sub>M<sub>c</sub>B</sub>). **G-H)** Blood glucose and plasma insulin  
77 values, respectively, during oral glucose tolerance test (OGTT) before dietary intervention (week  
78 11). LFD n = 6, WD<sub>CNTL</sub> and WD<sub>M<sub>c</sub>B</sub> n = 15 except in H at 60 min where WD<sub>CNTL</sub> and WD<sub>M<sub>c</sub>B</sub> n =  
79 14 as well as 90 and 120 min where WD<sub>M<sub>c</sub>B</sub> n = 12 due to insufficient sample material. **I)** Plasma  
80 insulin values from OGTT week 12+5. LFD n = 6, WD<sub>CNTL</sub> and WD<sub>M<sub>c</sub>B</sub> n = 15. **J)** Lean mass in  
81 grams during the dietary intervention period as mean ± SEM of two independent experiments. LFD  
82 n = 6, WD<sub>CNTL</sub> and WD<sub>M<sub>c</sub>B</sub> n = 15. **A-F)** Bars represent mean ± SEM and dots indicates individual  
83 data points. p-values < 1\*10<sup>-1</sup> between WD<sub>REF</sub> and indicated group are depicted. **G-J)** Lines  
84 represent mean and dots indicate individual data points from two independent experiments. p-values  
85 < 1\*10<sup>-1</sup> between WD<sub>CNTL</sub> and LFD (grey p-value), and WD<sub>CNTL</sub> and WD<sub>M<sub>c</sub>B</sub> (black p-value) are  
86 depicted. Statistical significance compared to WD<sub>CNTL</sub> by two-way ANOVA-RM, adjusted for  
87 multiple comparisons by Dunnett post hoc except for H where mixed effect analysis and Dunnetts  
88 post hoc test were used.  
89  
90



# Supplementary Figure 5

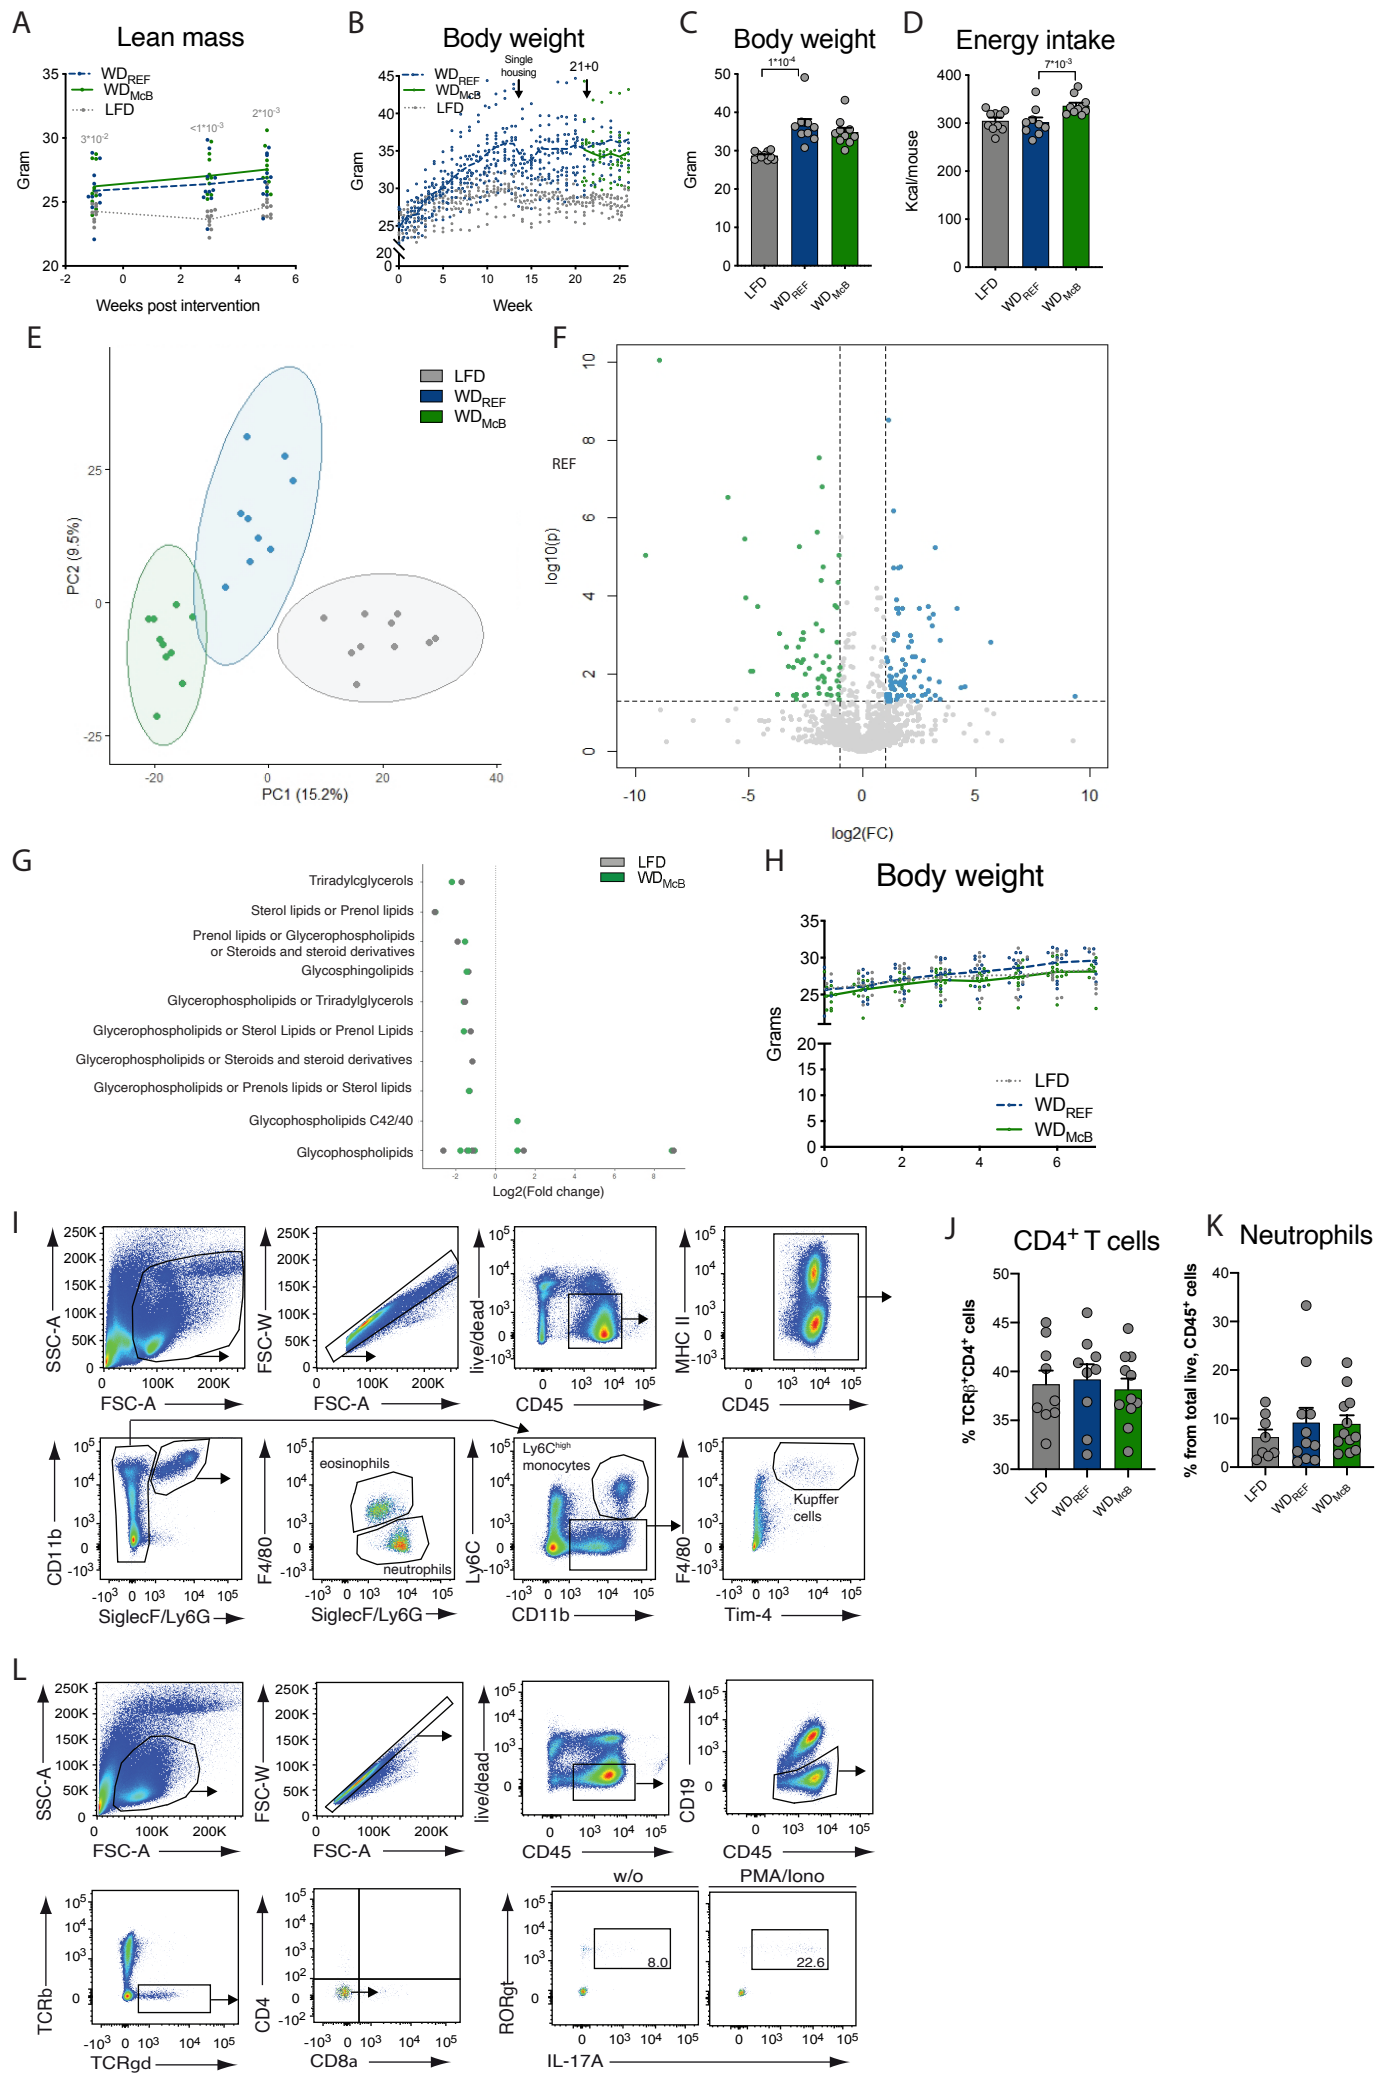

91 **Supplementary Figure 5: Altered hepatic lipidome profile in response to WD<sub>M<sub>c</sub>B</sub> feeding. A)**  
92 Lean mass in grams during the dietary intervention period. Lines represent mean and dots indicate  
93 individual data points. Statistical significance compared to WD<sub>REF</sub> by two-way ANOVA-RM,  
94 adjusted for multiple comparisons by Dunnett post hoc. n = 10 per group. **B)** Body weight  
95 development; mice were fed either LFD or WD<sub>REF</sub> for the first 21 weeks, as indicated. WD<sub>REF</sub>-fed  
96 mice were subsequently stratified into experimental groups, fed indicated diets for additional 5  
97 weeks. n = 10 per group. **C)** Final body weight week 21+5. Bars represents mean ± SEM and dots  
98 indicate individual data points. Statistical significant differences to WD<sub>REF</sub> by one-way ANOVA,  
99 adjusted for multiple comparisons by Dunnett's post hoc. n = 10 (LFD and WD<sub>M<sub>c</sub>B</sub>) or 9 (WD<sub>REF</sub>).  
100 **D)** Cumulative energy intake in kcal per mouse during dietary intervention (week 21+0 to 21+5).  
101 Bars represents mean ± SEM and dots indicate individual data points. Statistical significant  
102 differences to WD<sub>REF</sub> by one-way ANOVA, adjusted for multiple comparisons by Dunnett's post  
103 hoc. n = 10 (LFD and WD<sub>M<sub>c</sub>B</sub>) or 9 (WD<sub>REF</sub>). **E)** Principle coordinate analysis (PCoA) of hepatic  
104 lipid species identified in positive ionization mode. **F)** As in (E) but depicted in a volcano plot with  
105 significantly regulated lipid species (FDR < 0.05) presented on a log<sub>2</sub> scale in either green  
106 (WD<sub>M<sub>c</sub>B</sub> > WD<sub>REF</sub>) or blue (WD<sub>M<sub>c</sub>B</sub> < WD<sub>REF</sub>). **G)** Lipid pathways identified by fold-change  
107 analysis separating LFD (grey) and WD<sub>M<sub>c</sub>B</sub> (green) groups from WD<sub>REF</sub> in positive ionization  
108 mode. **H)** Body weight development in 'weight-matched' WT mice fed the respective diets for 7  
109 weeks. Lines represent mean and dots indicate individual datapoints. n = 9 (LFD), 11 (WD<sub>REF</sub>) or  
110 12 (WD<sub>M<sub>c</sub>B</sub>). **I)** Gating strategy of hepatic monocytes in mice from (H). Corresponds to Figure 5G,  
111 I-J; Supplementary Figure 5K. **J-K)** Amount of CD4<sup>+</sup> T cells and neutrophils in livers of 'weight-  
112 matched' WT mice fed the respective diets for 7 weeks. Bars represents mean ± SEM and dots  
113 indicate individual data points. Statistical significant differences to WD<sub>REF</sub> by one-way ANOVA,  
114 adjusted for multiple comparisons by Dunnett's post hoc. n = 9 (LFD and WD<sub>REF</sub>) or 11 (WD<sub>M<sub>c</sub>B</sub>).  
115 **L)** Gating strategy of hepatic IL-17<sup>+</sup> γδ-T cells in mice from (H), gated as single live cells,  
116 CD45<sup>+</sup>CD19<sup>-</sup>TCRβ<sup>-</sup>CD4<sup>-</sup> CD8α<sup>-</sup>TCRγδ<sup>+</sup>RORγt<sup>+</sup>IL-17A<sup>+</sup>. Corresponds to Figure 5K. Representative  
117 data of cells after stimulation with or without (w/o) PMA and Ionomycin (PMA/Iono) are shown.  
118  
119

# Supplementary Figure 6

WT

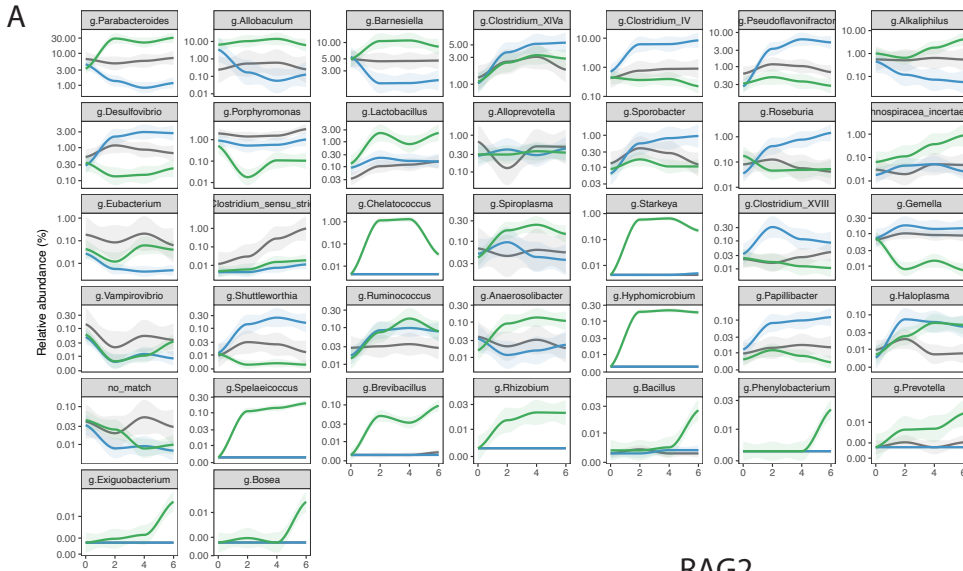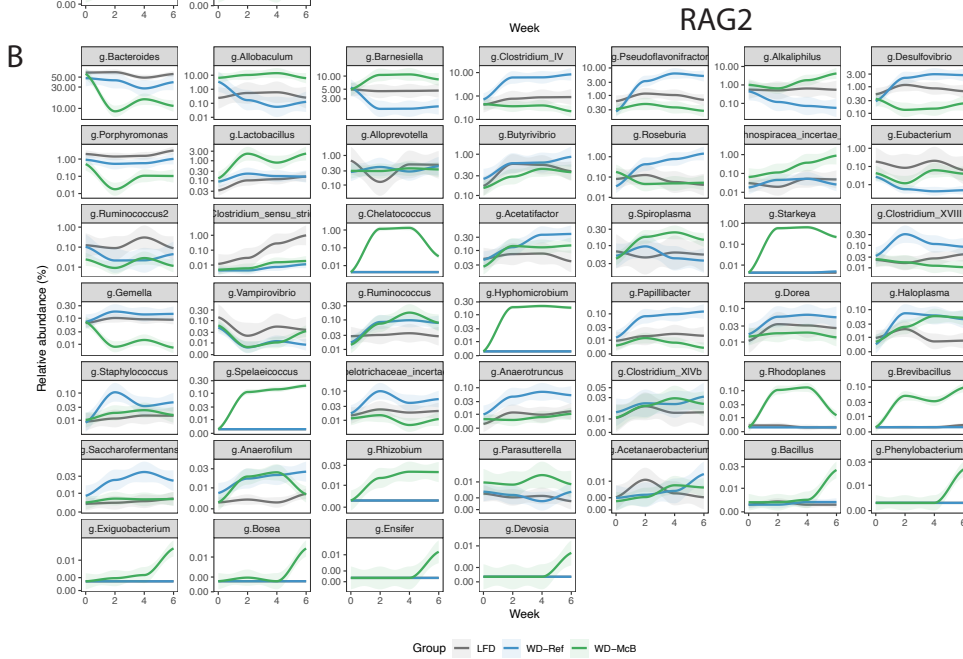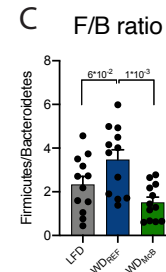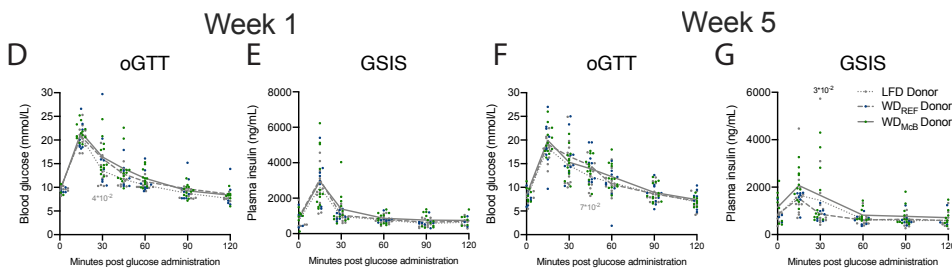

120 **Supplementary Figure 6: Immunometabolism and gut microbiota interactions. A-B)** Deseq  
121 analysis of fecal bacterial genera abundances significantly regulated by McB intervention compared  
122 to the WD<sub>REF</sub> (p.adj. < 0.05) in either WT (A) and RAG2<sup>-/-</sup> (B) mice. Relative abundance in % in  
123 each group and variation are shown for each regulated genus at the sampled time points. C)  
124 Firmicutes/Bacteroidetes ratio of fecal bacteria sampled after 6 weeks of experimental treatment of  
125 RAG2<sup>-/-</sup> mice. Bars represents mean ± SEM and dots indicate individual data points. Statistical  
126 significant differences to WD<sub>REF</sub> by Kruskal-Wallis, adjusted for multiple comparisons by Dunn's  
127 post hoc. n = 12 per group. D-G) Blood glucose and plasma insulin values, respectively, during oral  
128 glucose tolerance test (OGTT) either 1 or 5 weeks after first cecal microbiota transfer in LFD-fed  
129 recipient mice. Lines represent mean and dots indicate individual datapoints. Statistical significant  
130 differences to WD<sub>REF</sub> by mixed effect analysis and Dunnetts post hoc test. p-values < 1\*10<sup>-1</sup>  
131 between WD<sub>REF</sub> and LFD (grey p-value), and WD<sub>REF</sub> and WD<sub>McB</sub> (black p-value) are depicted. D-  
132 E) n = 11 (LFD), 8 (WD<sub>REF</sub>) and 12 (WD<sub>McB</sub>), except for (E) time 0, where LFD = 8, WD<sub>REF</sub> = 6,  
133 and WD<sub>McB</sub> = 11, as well as time 60, 90 and 120 where WD<sub>McB</sub> = 11. F) n = 12 (LFD and WD<sub>McB</sub>)  
134 and 9 (WD<sub>REF</sub>), except for time 120 where WD<sub>McB</sub> = 11. G) n = 12 (LFD and WD<sub>McB</sub>) and 7  
135 (WD<sub>REF</sub>), except for time 0-60 WD<sub>McB</sub> = 11 and time 90-120 where LFD = 11 due to insufficient  
136 sample material.

137

138

139 **Supplementary Table 1: Experimental diet compositions**

|                          |   | WD <sub>No Protein</sub> | WD <sub>REF</sub> | WD <sub>CNTL</sub> | WD <sub>McB</sub> | LFD     |
|--------------------------|---|--------------------------|-------------------|--------------------|-------------------|---------|
| Corn starch              | % | 5,0000                   | 5,0000            | 5,0000             | 5,0000            | 52,0000 |
| Maltodextrin             | % | 10,0000                  | 10,0000           | 10,0000            | 10,0000           | -----   |
| Sucrose                  | % | 31,6300                  | 31,6300           | 31,6300            | 31,6300           | 9,7270  |
| Cellulose powder         | % | 5,0000                   | 5,0000            | 5,0000             | 5,0000            | 5,0000  |
| L-Cystine                | % | 0,3000                   | 0,3000            | 0,3000             | 0,3000            | 0,3000  |
| DL-Methionine            | % | 0,1600                   | 0,1600            | 0,1600             | 0,1600            | 0,1600  |
| Vitamin premix           | % | 1,0000                   | 1,0000            | 1,0000             | 1,0000            | 1,0000  |
| Mineral premix           | % | 6,0000                   | 6,0000            | 6,0000             | 6,0000            | 3,5000  |
| Choline chloride         | % | 0,2500                   | 0,2500            | 0,2500             | 0,2500            | 0,2500  |
| Vitamin K3               | % | -----                    | -----             | -----              | -----             | 0,0005  |
| Vitamin B12              | % | -----                    | -----             | -----              | -----             | 0,0025  |
| Butylated hydroxytoluene | % | 0,0100                   | 0,0100            | 0,0100             | 0,0100            | 0,0100  |
| Cholesterol              | % | 0,1500                   | 0,1500            | 0,1500             | 0,1500            | -----   |
| Na CMC                   | % | -----                    | -----             | -----              | -----             | 1,0000  |
| Soybean oil              | % | 21,0000                  | 21,0000           | 21,0000            | 21,0000           | 7,0000  |
| Casein                   | % | -----                    | 19,5000           | 16,5000            | -----             | 20,0000 |
| McB whole-cell lysate    | % | -----                    | -----             | -----              | 19,5000           | -----   |
| Macadamia oil            | % | -----                    | -----             | 3,0000             | -----             | -----   |
| Total                    | % | 80,5                     | 100,0             | 100,0              | 100,0             | 100,0   |

140

141 Supplementary Table 1: Composition of experimental diets used in the studies as % weight.

142 Experimental diets were based on lot-matched WDNo Protein, and subsequently added casein,  
 143 macadamia oil and McB whole-cell lysate as indicated.

144

145 **Supplementary Table 2: Primer sequences and annealing temperature for qPCR**

| Target gene  | Forward primer sequence             | Reverse primer sequence         | Annealing temp. (°C) |
|--------------|-------------------------------------|---------------------------------|----------------------|
| <i>Scd1</i>  | ACA CCT<br>GCC TCT<br>TCG GGA<br>TT | TGA TGC<br>CCA GAG<br>CGC TG    | 58                   |
| <i>Acaca</i> | TGC TGC<br>CCC ATC<br>CCC GGG       | TCG AAC<br>TCT CAC<br>TGA CAC G | 58                   |
| <i>Acox1</i> | GGG TCA<br>TGG AAC                  | GAA TGA<br>ACT CTT              | 58                   |

|               |                                         |                                      |    |
|---------------|-----------------------------------------|--------------------------------------|----|
|               | TCA TCT<br>TCG A                        | GGG TCT<br>TGG G                     |    |
| <i>Pparg1</i> | GTG TGA<br>CAG ACA<br>AGA TTT<br>GAA AG | GCT TGA<br>TGT CAA<br>AGG AAT<br>GCG | 60 |
| <i>Pparg2</i> | ACA GCA<br>AAT CTC<br>TGT TTT<br>ATG    | TGC TGG<br>AGA AAT<br>CAA CTG<br>TGG | 60 |
| <i>Ppara</i>  | AGA GAG<br>GAC AGA<br>TGG GGC<br>TC     | CGT TTG<br>TGG CTG<br>GTC AAG<br>TT  | 60 |

146

147

**Supplementary Table 3: Deseq analysis from 12+6 week experiments**

| Related to Figure 1                    |                |              |                 |                 |
|----------------------------------------|----------------|--------------|-----------------|-----------------|
| Genus                                  | Fold change    | Log2FC       | p value         | Adj p value     |
| <b>g:Chelatococcus</b>                 | <b>1573,07</b> | <b>10,62</b> | <b>4,43E-25</b> | <b>2,88E-23</b> |
| <b>g:Barnesiella</b>                   | <b>27,46</b>   | <b>4,78</b>  | <b>3,07E-20</b> | <b>6,65E-19</b> |
| <b>g:Parabacteroides</b>               | <b>23,89</b>   | <b>4,58</b>  | <b>2,22E-20</b> | <b>6,65E-19</b> |
| <b>g:Vampirovibrio</b>                 | <b>1401,99</b> | <b>10,45</b> | <b>3,08E-18</b> | <b>5,01E-17</b> |
| <b>g:Anaerofilum</b>                   | <b>408,29</b>  | <b>8,67</b>  | <b>6,55E-18</b> | <b>8,52E-17</b> |
| <b>g:Parasutterella</b>                | <b>109,80</b>  | <b>6,78</b>  | <b>8,74E-16</b> | <b>9,47E-15</b> |
| <b>g:Microvirga</b>                    | <b>268,76</b>  | <b>8,07</b>  | <b>1,35E-14</b> | <b>1,25E-13</b> |
| <b>g:Brevibacillus</b>                 | <b>88,56</b>   | <b>6,47</b>  | <b>9,74E-09</b> | <b>7,36E-08</b> |
| <b>g:Pseudoxanthomonas</b>             | <b>84,23</b>   | <b>6,40</b>  | <b>1,02E-08</b> | <b>7,36E-08</b> |
| <b>g:Clostridium_IV</b>                | <b>0,24</b>    | <b>-2,06</b> | <b>5,16E-08</b> | <b>3,35E-07</b> |
| <b>g:Isoptericola</b>                  | <b>51,65</b>   | <b>5,69</b>  | <b>5,17E-07</b> | <b>3,05E-06</b> |
| <b>g:Eubacterium</b>                   | <b>7,88</b>    | <b>2,98</b>  | <b>3,56E-06</b> | <b>1,93E-05</b> |
| <b>g:Akkermansia</b>                   | <b>632,32</b>  | <b>9,30</b>  | <b>7,69E-06</b> | <b>3,84E-05</b> |
| <b>g:Clostridium_XIVa</b>              | <b>2,64</b>    | <b>1,40</b>  | <b>2,23E-05</b> | <b>0,0001</b>   |
| <b>g:Staphylococcus</b>                | <b>7,28</b>    | <b>2,86</b>  | <b>0,0002</b>   | <b>0,001</b>    |
| <b>g:Papillibacter</b>                 | <b>0,25</b>    | <b>-2,01</b> | <b>0,0002</b>   | <b>0,001</b>    |
| <b>g:Acetatifactor</b>                 | <b>0,44</b>    | <b>-1,19</b> | <b>0,001</b>    | <b>0,002</b>    |
| <b>g:Lachnospiracea_incertae_sedis</b> | <b>0,16</b>    | <b>-2,61</b> | <b>0,001</b>    | <b>0,002</b>    |

|                               |             |              |              |              |
|-------------------------------|-------------|--------------|--------------|--------------|
| <b>g:Odoribacter</b>          | <b>8,16</b> | <b>3,03</b>  | <b>0,001</b> | <b>0,002</b> |
| <b>g:Bacteroides</b>          | <b>2,81</b> | <b>1,49</b>  | <b>0,002</b> | <b>0,01</b>  |
| <b>g:Alistipes</b>            | <b>2,83</b> | <b>1,50</b>  | <b>0,003</b> | <b>0,01</b>  |
| <b>g:Porphyromonas</b>        | <b>4,77</b> | <b>2,25</b>  | <b>0,004</b> | <b>0,01</b>  |
| <b>g:Haloplasma</b>           | <b>5,41</b> | <b>2,44</b>  | <b>0,01</b>  | <b>0,02</b>  |
| <b>g:Desulfovibrio</b>        | <b>0,44</b> | <b>-1,17</b> | <b>0,01</b>  | <b>0,03</b>  |
| <b>g:Blautia</b>              | <b>0,24</b> | <b>-2,05</b> | <b>0,01</b>  | <b>0,03</b>  |
| <b>g:Escherichia/Shigella</b> | <b>0,14</b> | <b>-2,88</b> | <b>0,01</b>  | <b>0,04</b>  |
| <b>g:Murimonas</b>            | <b>0,34</b> | <b>-1,57</b> | <b>0,02</b>  | <b>0,04</b>  |
| <b>g:Anaerovorax</b>          | <b>3,76</b> | <b>1,91</b>  | <b>0,02</b>  | <b>0,04</b>  |
| <b>g:Shuttleworthia</b>       | <b>0,27</b> | <b>-1,87</b> | <b>0,02</b>  | <b>0,05</b>  |
| g:Alkaliphilus                | 0,15        | -2,77        | 0,03         | 0,06         |
| g:Dorea                       | 0,41        | -1,28        | 0,03         | 0,07         |
| g:Allobaculum                 | 2,17        | 1,12         | 0,04         | 0,07         |
| g:Christensenella             | 8,11        | 3,02         | 0,04         | 0,07         |
| g:Streptococcus               | 0,34        | -1,57        | 0,03         | 0,07         |
| g:Clostridium XVIII           | 0,39        | -1,36        | 0,04         | 0,07         |
| g:Clostridium III             | 2,16        | 1,11         | 0,04         | 0,07         |
| g:Ruminococcus                | 0,42        | -1,24        | 0,04         | 0,07         |
| g:Pseudoflavonifractor        | 0,55        | -0,86        | 0,05         | 0,08         |
| g:Saccharofermentans          | 2,46        | 1,30         | 0,05         | 0,09         |
| g:Lutispora                   | 4,23        | 2,08         | 0,06         | 0,10         |
| g:Butyrivibrio                | 1,75        | 0,81         | 0,08         | 0,12         |
| g:Aestuariispira              | 3,27        | 1,71         | 0,09         | 0,15         |
| g:Hydrogenoanaerobacterium    | 3,16        | 1,66         | 0,11         | 0,16         |
| g:Anaerotruncus               | 0,55        | -0,87        | 0,12         | 0,18         |
| g:Enterorhabdus               | 0,46        | -1,13        | 0,13         | 0,19         |
| g:Flavonifractor              | 0,59        | -0,76        | 0,14         | 0,19         |
| g:Roseburia                   | 0,54        | -0,88        | 0,14         | 0,20         |
| g:Sporobacter                 | 1,95        | 0,96         | 0,15         | 0,21         |
| g:Coproccoccus                | 0,32        | -1,62        | 0,17         | 0,22         |
| g:Romboutsia                  | 0,26        | -1,95        | 0,26         | 0,34         |
| g:Intestinimonas              | 0,59        | -0,77        | 0,29         | 0,36         |
| g:Butyricococcus              | 0,34        | -1,55        | 0,30         | 0,38         |
| g:Marvinbryantia              | 1,69        | 0,75         | 0,35         | 0,44         |
| g:Clostridium XIVb            | 0,78        | -0,35        | 0,38         | 0,46         |
| g:Clostridium sensu stricto   | 0,51        | -0,97        | 0,50         | 0,59         |
| g:Gracilibacter               | 1,44        | 0,53         | 0,52         | 0,60         |
| g:Catabacter                  | 1,22        | 0,29         | 0,56         | 0,64         |
| g:Anaerosporebacter           | 0,69        | -0,53        | 0,60         | 0,67         |

|                                          |                    |               |                |                    |
|------------------------------------------|--------------------|---------------|----------------|--------------------|
| g:Bilophila                              | 0,79               | -0,33         | 0,67           | 0,73               |
| g:Enterococcus                           | 1,46               | 0,54          | 0,67           | 0,73               |
| g:Lactobacillus                          | 1,17               | 0,23          | 0,73           | 0,78               |
| g:Alloprevotella                         | 1,17               | 0,23          | 0,75           | 0,79               |
| g:Olsenella                              | 1,13               | 0,17          | 0,84           | 0,86               |
| g:Senegalimassilia                       | 0,86               | -0,21         | 0,85           | 0,86               |
| g:Oscillibacter                          | 1,01               | 0,01          | 0,99           | 0,99               |
| <b>Related to Supplementary Figure 2</b> |                    |               |                |                    |
| <b>Genus</b>                             | <b>Fold change</b> | <b>Log2FC</b> | <b>p value</b> | <b>Adj p value</b> |
| g:Akkermansia                            | 0,0007             | -10,44        | 5,67E-35       | 4,08E-33           |
| g:Bacillus                               | 83,30              | 6,38          | 4,04E-15       | 1,45E-13           |
| g:Acetatifactor                          | 0,20               | -2,30         | 9,26E-12       | 2,22E-10           |
| g:Lactobacillus                          | 32,59              | 5,03          | 1,43E-11       | 2,46E-10           |
| g:Parasutterella                         | 15,59              | 3,96          | 1,71E-11       | 2,46E-10           |
| g:Clostridium_IV                         | 0,17               | -2,53         | 3,98E-11       | 4,78E-10           |
| g:Nocardioides                           | 52,24              | 5,71          | 9,07E-11       | 9,33E-10           |
| g:Clostridium_XVIII                      | 0,09               | -3,54         | 3,02E-09       | 2,72E-08           |
| g:Clostridium_XIVa                       | 2,25               | 1,17          | 1,36E-08       | 1,09E-07           |
| g:Sporobacter                            | 0,21               | -2,22         | 1,77E-08       | 1,28E-07           |
| g:Brevibacillus                          | 22,94              | 4,52          | 6,24E-08       | 4,08E-07           |
| g:Eubacterium                            | 4,77               | 2,25          | 9,72E-08       | 5,83E-07           |
| g:Parabacteroides                        | 4,21               | 2,07          | 4,94E-07       | 2,74E-06           |
| g:Porphyromonas                          | 3,77               | 1,92          | 5,48E-07       | 2,82E-06           |
| g:Barnesiella                            | 3,31               | 1,73          | 1,09E-06       | 5,25E-06           |
| g:Enterococcus                           | 26,51              | 4,73          | 1,43E-06       | 6,42E-06           |
| g:Sphingopyxis                           | 21,41              | 4,42          | 1,72E-06       | 7,28E-06           |
| g:Anaerovorax                            | 5,93               | 2,57          | 2,10E-05       | 8,41E-05           |
| g:Haloplasma                             | 3,38               | 1,76          | 9,88E-05       | 0,0004             |
| g:Arthrobacter                           | 9,18               | 3,20          | 0,0003         | 0,001              |
| g:Rhizobium                              | 8,90               | 3,15          | 0,0003         | 0,001              |
| g:Vampirovibrio                          | 6,25               | 2,64          | 0,0003         | 0,001              |
| g:Allobaculum                            | 4,86               | 2,28          | 0,0004         | 0,001              |
| g:Neorhizobium                           | 8,18               | 3,03          | 0,001          | 0,002              |
| g:Paenibacillus                          | 7,85               | 2,97          | 0,001          | 0,002              |
| g:Romboutsia                             | 4,91               | 2,29          | 0,001          | 0,002              |
| g:Clostridium_sensu_stricto              | 12,44              | 3,64          | 0,001          | 0,002              |
| g:Anaerotruncus                          | 0,48               | -1,07         | 0,001          | 0,004              |
| g:Butyricicoccus                         | 0,22               | -2,21         | 0,001          | 0,004              |
| g:Staphylococcus                         | 6,33               | 2,66          | 0,002          | 0,01               |



|                                      |             |              |              |             |
|--------------------------------------|-------------|--------------|--------------|-------------|
| <b>g:Catenisphaera</b>               | <b>7,26</b> | <b>2,86</b>  | <b>0,002</b> | <b>0,01</b> |
| <b>g:Catabacter</b>                  | <b>0,47</b> | <b>-1,10</b> | <b>0,003</b> | <b>0,01</b> |
| <b>g:Papillibacter</b>               | <b>0,43</b> | <b>-1,23</b> | <b>0,003</b> | <b>0,01</b> |
| <b>g:Coprobacillus</b>               | <b>0,06</b> | <b>-4,00</b> | <b>0,01</b>  | <b>0,01</b> |
| <b>g:Dorea</b>                       | <b>0,45</b> | <b>-1,16</b> | <b>0,01</b>  | <b>0,02</b> |
| <b>g:Lutispora</b>                   | <b>2,96</b> | <b>1,56</b>  | <b>0,02</b>  | <b>0,04</b> |
| <b>g:Shuttleworthia</b>              | <b>0,17</b> | <b>-2,54</b> | <b>0,02</b>  | <b>0,04</b> |
| g:Alloprevotella                     | 0,51        | -0,98        | 0,03         | 0,05        |
| g:Pseudoflavonifractor               | 0,63        | -0,67        | 0,03         | 0,05        |
| g:Hydrogenoanaerobacterium           | 2,49        | 1,32         | 0,03         | 0,06        |
| g:Clostridium_XIVb                   | 0,74        | -0,44        | 0,08         | 0,14        |
| g:Intestinimonas                     | 1,79        | 0,84         | 0,08         | 0,14        |
| g:Turicibacter                       | 3,32        | 1,73         | 0,08         | 0,14        |
| g:Prevotella                         | 3,25        | 1,70         | 0,08         | 0,14        |
| g:Erysipelotrichaceae_incertae_sedis | 3,62        | 1,86         | 0,12         | 0,19        |
| g:Roseburia                          | 0,54        | -0,88        | 0,14         | 0,21        |
| g:Christensenella                    | 2,02        | 1,01         | 0,18         | 0,27        |
| g:Desulfovibrio                      | 0,80        | -0,33        | 0,23         | 0,34        |
| g:Lachnospiracea_incertae_sedis      | 1,35        | 0,43         | 0,22         | 0,34        |
| g:Murimonas                          | 1,78        | 0,83         | 0,23         | 0,34        |
| g:Anaerospobacter                    | 0,59        | -0,76        | 0,25         | 0,35        |
| g:Odoribacter                        | 1,55        | 0,63         | 0,31         | 0,42        |
| g:Enterorhabdus                      | 1,47        | 0,56         | 0,33         | 0,45        |
| g:Blautia                            | 0,61        | -0,71        | 0,37         | 0,47        |
| g:Butyrivibrio                       | 0,70        | -0,51        | 0,37         | 0,47        |
| g:Oscillibacter                      | 1,23        | 0,30         | 0,37         | 0,47        |
| g:Streptococcus                      | 0,69        | -0,54        | 0,36         | 0,47        |
| g:Olsenella                          | 0,53        | -0,91        | 0,46         | 0,58        |
| g:Bilophila                          | 1,15        | 0,20         | 0,53         | 0,64        |
| g:Coprococcus                        | 1,32        | 0,40         | 0,54         | 0,64        |
| g:Aestuariispira                     | 0,73        | -0,46        | 0,57         | 0,67        |
| g:Bacteroides                        | 0,84        | -0,26        | 0,58         | 0,67        |
| g:Ruminococcus2                      | 2,00        | 1,00         | 0,58         | 0,67        |
| g:Saccharofermentans                 | 1,16        | 0,22         | 0,64         | 0,72        |
| g:Gracilibacter                      | 0,88        | -0,18        | 0,75         | 0,83        |
| g:Alkaliphilus                       | 0,84        | -0,25        | 0,77         | 0,84        |
| g:Alistipes                          | 0,94        | -0,09        | 0,85         | 0,89        |
| g:Flavonifractor                     | 1,04        | 0,06         | 0,86         | 0,89        |
| g:Gemella                            | 0,90        | -0,15        | 0,88         | 0,89        |
| g:Ruminococcus                       | 1,05        | 0,07         | 0,87         | 0,89        |

|                    |      |       |      |      |
|--------------------|------|-------|------|------|
| g:Senegalimassilia | 0,90 | -0,15 | 0,87 | 0,89 |
| g:Clostridium III  | 1,01 | 0,01  | 0,96 | 0,96 |

148

149 Results from deseq analysis of bacterial genera of the two experiments presented in Figure 1 &  
150 Supplementary Figure 2 featuring genus name, Fold change and Log2 fold change, comparing  
151  $WD_{McB}$  to  $WD_{CNTL}$ . Unadjusted p-values as well as p-values adjusted by Benjamini-Hochberg  
152 method are reported and statistically significantly affected genera (Adj.  $p < 0.05$ ) are marked in  
153 bold.

154

155

**Supplementary Table 4: Lipid species altered by McB:**

| Lipid                        | Adjusted p-value between $WD_{REF}$ and LFD | Adjusted p-value between $WD_{REF}$ and $WD_{McB}$ |
|------------------------------|---------------------------------------------|----------------------------------------------------|
| <b>Upregulated by McB:</b>   |                                             |                                                    |
| lysoPC 17:1                  | 0,7072                                      | 0,0022                                             |
| PC 33:1 B                    | 0,5237                                      | <0,0001                                            |
| PC 33:5 D                    | 0,0001                                      | <0,0001                                            |
| PC 38:4 C                    | <0,0001                                     | <0,0001                                            |
| PC 39:6                      | 0,0021                                      | <0,0001                                            |
| PE 38:5                      | 0,0004                                      | 0,0081                                             |
| plasmeyl-PC 36:3             | 0,0002                                      | 0,0004                                             |
| <b>Downregulated by McB:</b> |                                             |                                                    |
| lysoPC 16:1                  | 0,9977                                      | 0,0023                                             |
| lysoPC 18:1                  | 0,4575                                      | 0,0065                                             |
| lysoPC 20:1                  | 0,0003                                      | 0,0001                                             |
| lysoPC 20:2                  | 0,0027                                      | 0,0028                                             |
| lysoPC 20:3                  | 0,0019                                      | 0,0005                                             |
| lysoPC 20:4 A                | 0,9830                                      | 0,0018                                             |
| PC 32:1                      | 0,0004                                      | 0,0012                                             |
| PC 33:5 C                    | 0,0933                                      | <0,0001                                            |
| PC 34:3                      | 0,4656                                      | 0,0001                                             |
| PC 35:4                      | <0,0001                                     | 0,0003                                             |
| PC 36:3 A                    | 0,0003                                      | 0,0002                                             |
| PC 36:3 B                    | <0,0001                                     | <0,0001                                            |
| PC 36:5 B                    | 0,9151                                      | <0,0001                                            |
| PC 37:4 A                    | 0,0009                                      | 0,0085                                             |
| PC 38:4 A                    | 0,0001                                      | 0,0004                                             |
| PC 38:4 B                    | <0,0001                                     | <0,0001                                            |
| PC 38:5 A                    | 0,2436                                      | <0,0001                                            |
| PC 38:6 B                    | 0,0006                                      | <0,0001                                            |
| PC 39:7                      | 0,0022                                      | 0,0033                                             |
| PC 40:7 B                    | 0,0006                                      | 0,0001                                             |

156

157 Reported p-values compared to the  $WD_{REF}$  are obtained by mixed-effects analysis, adjusted for  
 158 multiple comparisons by Dunnett's post hoc.

159

160 **Supplementary Table 5: Deseq analysis from 21+5 week experiment**

161

| Related to Figure 6    |             |        |         |             |
|------------------------|-------------|--------|---------|-------------|
| Genus                  | Fold change | Log2FC | p value | Adj p value |
| g:Parasutterella       | 2066,66     | 11,013 | 1,4E-38 | 9,3E-37     |
| g:Parabacteroides      | 94,91       | 6,568  | 7,6E-33 | 2,6E-31     |
| g:Brevibacillus        | 138,42      | 7,113  | 9,1E-18 | 2,1E-16     |
| g:Pseudoflavonifractor | 0,09        | -3,418 | 3,4E-14 | 5,9E-13     |
| g:Odoribacter          | 19,74       | 4,303  | 1,9E-13 | 2,6E-12     |
| g:Desulfovibrio        | 0,18        | -2,501 | 4,8E-09 | 5,5E-08     |
| g:Haloplasma           | 13,78       | 3,785  | 7,0E-09 | 6,9E-08     |
| g:Dorea                | 0,11        | -3,168 | 1,3E-08 | 9,9E-08     |
| g:Flavonifractor       | 0,11        | -3,153 | 1,3E-08 | 9,9E-08     |
| g:Acetatifactor        | 0,16        | -2,621 | 2,3E-07 | 1,6E-06     |
| g:Rhodococcus          | 40,07       | 5,325  | 3,5E-07 | 2,2E-06     |
| g:Romboutsia           | 0,04        | -4,556 | 2,9E-06 | 1,7E-05     |
| g:Alistipes            | 3,95        | 1,982  | 4,3E-06 | 2,3E-05     |
| g:Porphyromonas        | 8,17        | 3,031  | 1,5E-05 | 7,4E-05     |
| g:Shuttleworthia       | 0,09        | -3,499 | 1,6E-05 | 7,4E-05     |
| g:Allobaculum          | 2,74        | 1,454  | 1,0E-04 | 4,3E-04     |
| g:Barnesiella          | 2,88        | 1,524  | 1,1E-04 | 4,7E-04     |
| g:Anaerotruncus        | 0,24        | -2,039 | 2,0E-04 | 7,5E-04     |
| g:Akkermansia          | 8,07        | 3,013  | 3,5E-04 | 1,3E-03     |
| g:Mucispirillum        | 0,14        | -2,789 | 4,8E-04 | 1,7E-03     |
| g:Cohnella             | 15,91       | 3,992  | 9,6E-04 | 3,1E-03     |
| g:Clostridium_IV       | 0,51        | -0,966 | 1,2E-03 | 3,6E-03     |
| g:Clostridium_XIVa     | 0,54        | -0,893 | 1,3E-03 | 3,8E-03     |
| g:Eubacterium          | 4,77        | 2,253  | 1,6E-03 | 4,5E-03     |
| g:Papillibacter        | 0,27        | -1,874 | 2,1E-03 | 5,8E-03     |
| g:Coproacter           | 13,09       | 3,710  | 3,0E-03 | 7,8E-03     |
| g:Oscillibacter        | 0,38        | -1,415 | 3,2E-03 | 8,2E-03     |
| g:Bifidobacterium      | 7,60        | 2,926  | 4,4E-03 | 1,1E-02     |
| g:Sporobacter          | 0,39        | -1,364 | 1,0E-02 | 2,5E-02     |
| g:Clostridium_XVIII    | 0,36        | -1,481 | 1,2E-02 | 2,8E-02     |
| g:Ruminococcus         | 0,44        | -1,178 | 1,6E-02 | 3,6E-02     |

|                                      |             |              |                |                |
|--------------------------------------|-------------|--------------|----------------|----------------|
| <b>g:Christensenella</b>             | <b>4,25</b> | <b>2,086</b> | <b>2,3E-02</b> | <b>4,9E-02</b> |
| g:Clostridium XIVb                   | 2,63        | 1,395        | 0,025          | 0,050          |
| g:Hydrogenoanaerobacterium           | 0,25        | -2,005       | 0,029          | 0,058          |
| g:Streptococcus                      | 0,38        | -1,406       | 0,033          | 0,064          |
| g:Butyrivibrio                       | 1,64        | 0,715        | 0,041          | 0,077          |
| g:Lactobacillus                      | 2,02        | 1,018        | 0,046          | 0,083          |
| g:Olsenella                          | 2,39        | 1,260        | 0,069          | 0,123          |
| g:Butyricoccus                       | 0,31        | -1,678       | 0,079          | 0,137          |
| g:Blautia                            | 0,47        | -1,096       | 0,113          | 0,182          |
| g:Pedobacter                         | 3,78        | 1,918        | 0,112          | 0,182          |
| g:Roseburia                          | 0,52        | -0,954       | 0,111          | 0,182          |
| g:Murimonas                          | 0,28        | -1,855       | 0,129          | 0,203          |
| g:Fodinicurvata                      | 3,54        | 1,822        | 0,140          | 0,214          |
| g:Holdemania                         | 1,96        | 0,970        | 0,150          | 0,225          |
| g:Clostridium_III                    | 1,42        | 0,506        | 0,184          | 0,264          |
| g:Intestinimonas                     | 0,54        | -0,877       | 0,183          | 0,264          |
| g:Anaerofilum                        | 0,44        | -1,168       | 0,191          | 0,269          |
| g:Anaerosolibacter                   | 0,32        | -1,630       | 0,208          | 0,287          |
| g:Coprococcus                        | 2,06        | 1,042        | 0,242          | 0,327          |
| g:Erysipelotrichaceae incertae sedis | 0,44        | -1,194       | 0,323          | 0,428          |
| g:Bilophila                          | 0,68        | -0,546       | 0,329          | 0,428          |
| g:Anaerovorax                        | 1,79        | 0,843        | 0,352          | 0,449          |
| g:Enterococcus                       | 2,38        | 1,251        | 0,366          | 0,459          |
| g:Staphylococcus                     | 0,61        | -0,707       | 0,379          | 0,468          |
| g:Escherichia/Shigella               | 0,42        | -1,250       | 0,411          | 0,498          |
| g:Bacteroides                        | 0,82        | -0,293       | 0,420          | 0,500          |
| g:Lachnospiraceae incertae sedis     | 0,75        | -0,408       | 0,469          | 0,548          |
| g:Lutispora                          | 1,83        | 0,871        | 0,493          | 0,567          |
| g:Alkaliphilus                       | 1,55        | 0,632        | 0,521          | 0,589          |
| g:Clostridium sensu stricto          | 1,60        | 0,680        | 0,562          | 0,625          |
| g:Enterorhabdus                      | 1,27        | 0,346        | 0,573          | 0,625          |
| no match                             | 2,30        | 1,202        | 0,579          | 0,625          |
| g:Gracilibacter                      | 1,23        | 0,304        | 0,591          | 0,627          |
| g:Saccharofermentans                 | 1,12        | 0,167        | 0,773          | 0,808          |
| g:Anaerosporeobacter                 | 0,97        | -0,047       | 0,938          | 0,952          |
| g:Tissierella                        | 1,06        | 0,078        | 0,938          | 0,952          |
| g:Spiroplasma                        | 1,03        | 0,038        | 0,969          | 0,969          |

160

161

164 Results from deseq analysis of bacterial genera of the 21+5 week experiment featuring genus name,  
165 Log2 fold change, comparing  $WD_{McB}$  to  $WD_{REF}$ . Unadjusted p-values as well as p-values adjusted  
166 by Benjamini-Hochberg method are reported and statistically significantly affected genera (Adj. p <  
167 0.05) are marked in bold.

168

169

170
